# Supplementary material for: Analysis of terbinafine in PLGA-based drug delivery systems by a fast and sensitive UHPLC-DAD method
Source: Royal Society of Chemistry journal article supplement (doi:10.1039/d3ay00506b), 2023-01-01
Supplement: d3ay00506b1.pdf [file d3ay00506b1.pdf]

## **SUPPLEMENTARY MATERIAL**

### **Analysis of terbinafine in PLGA-based drug delivery systems by a fast and sensitive UHPLC-DAD method**

Kristýna Mrštná, Kateřina Matoušová, Petr Matouš, Ludmila Matysová, Frantisek Švec, Eva Šnejdrová,  
Lenka Kujovská Krčmová

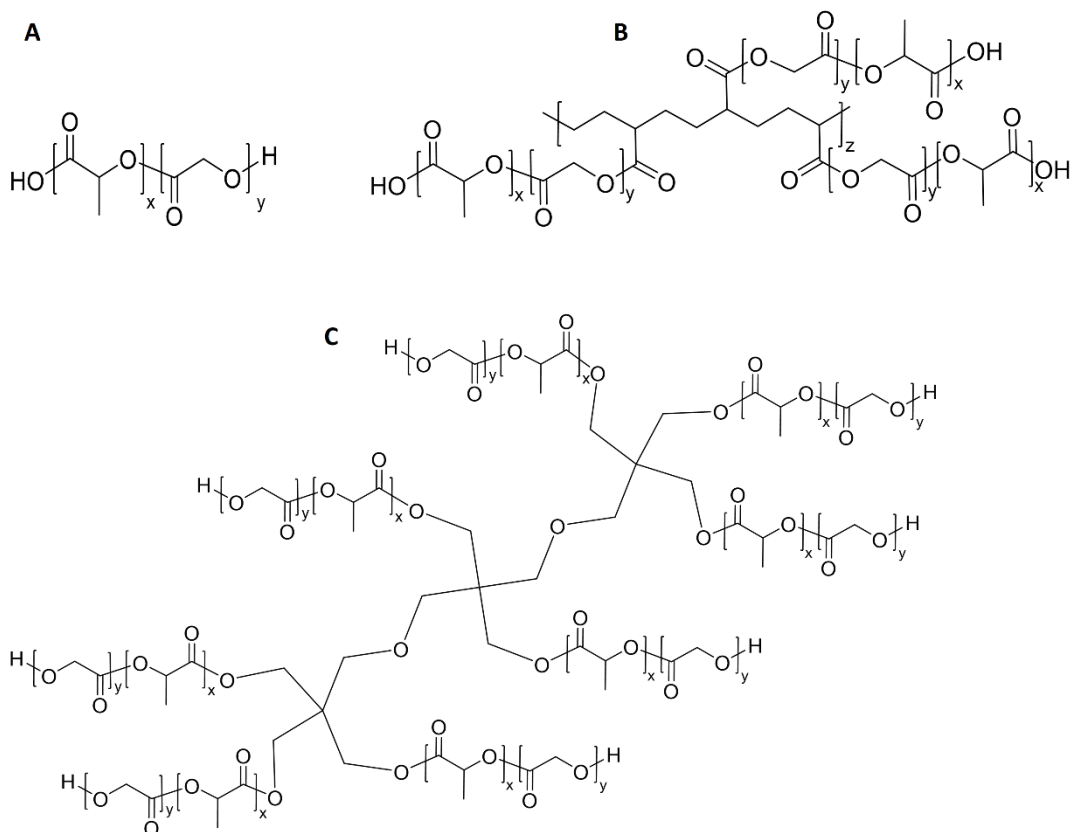

Figure S1 Chemical structure of poly(D,L-lactic-co-glycolic acid) (PLGA) (A), PLGA branched on polyacrylic acid (PLGA/A) (B), and on tripentaerythritol (PLGA/T) (C)

Table S1. Molar mass averages, intrinsic viscosity, and branching ratio for branched PLGA.

| Sample designation | $M_n$ (g/mol) | $M_w$ (g/mol) | $[\eta]_w$ (mL/g) | $g'(M_w)$ | $T_g$ (°C) |
|--------------------|---------------|---------------|-------------------|-----------|------------|
| PLGA/T             | 5,300         | 17,400        | 7.7               | 0.43      | 27.6       |
| PLGA/A             | 8,600         | 14,400        | 8.9               | 0.54      | 32.8       |

PLGA branched on tripentaerythritol (PLGA/T) and polyacrylic acid molar weight of 2,000 g·mol<sup>-1</sup> (PLGA/A).  $M_n$  number average molar mass;  $M_w$  weight average molar mass;  $[\eta]_w$  intrinsic viscosity;  $g'$  branching ratio;  $T_g$  glass transition temperature.

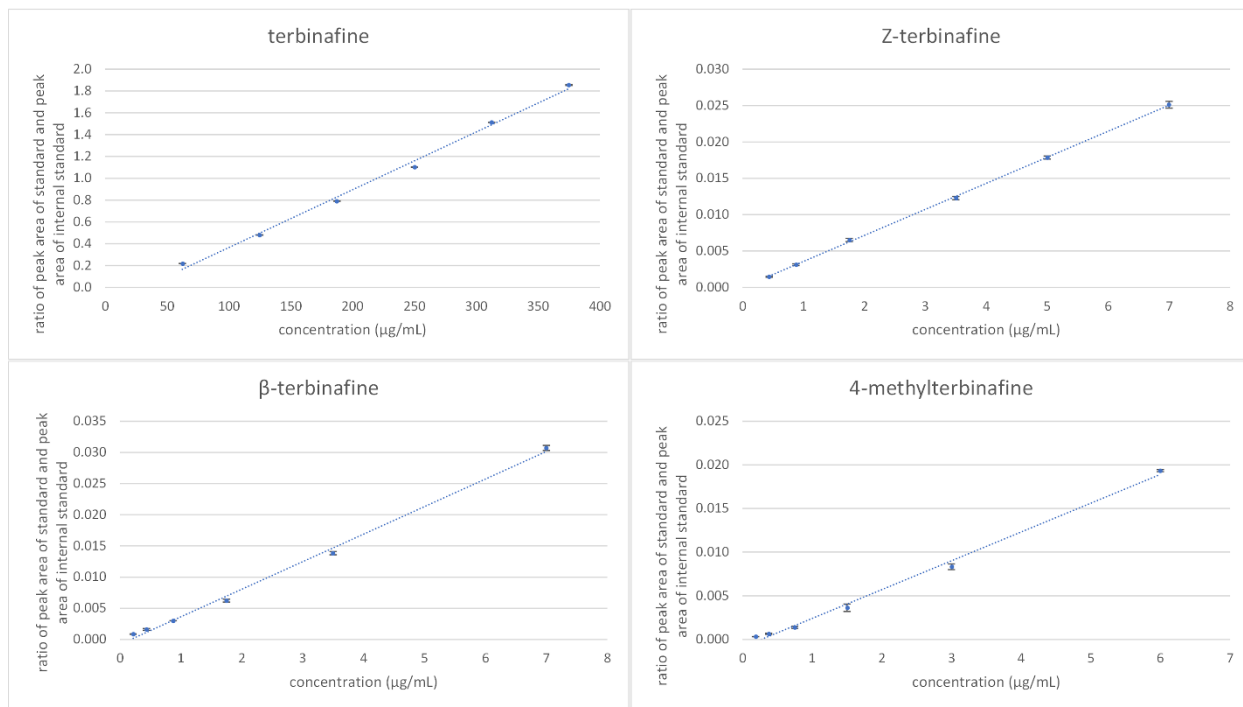

Figure S2 The linear relationship graphs for terbinafine, Z-terbinafine, β-terbinafine, and 4-methylterbinafine
